# Supplementary material
Source: PubMed Central journal article supplement (PMC9888265)
Supplement: ehp10477.smcontents.508.pdf [file ehp10477.smcontents.508.pdf]

**Note to readers with disabilities:** *EHP* strives to ensure that all journal content is accessible to all readers. However, some figures and Supplemental Material published in *EHP* articles may not conform to [508 standards](#) due to the complexity of the information being presented. If you need assistance accessing journal content, please contact [ehp508@niehs.nih.gov](mailto:ehp508@niehs.nih.gov). Our staff will work with you to assess and meet your accessibility needs within 3 working days.

### **Supplemental Material**

#### **BPDE, the Migration and Invasion of Human Trophoblast Cells, and Occurrence of Miscarriage in Humans: Roles of a Novel *lncRNA-HZ09***

Mengyuan Dai, Wenxin Huang, Xinying Huang, Chenglong Ma, Rong Wang, Peng Tian, Weina Chen, Ying Zhang, Chenyang Mi, and Huidong Zhang

#### **Table of Contents**

**Table S1.** DNA sequences used for construction of pcDNA3.1 overexpression plasmids.

**Table S2.** RNA sequences used for RNA transfection.

**Table S3.** PCR protocols for RACE assays.

**Table S4.** Primer sequences used for RACE assays.

**Table S5.** The full-length sequence of *lnc-HZ09*.

**Table S6.** RT-qPCR programs.

**Table S7.** Primer sequences used for RT-qPCR analysis (Sangon Biotech, Shanghai, China).

**Table S8.** Primer sequences used in various RT-qPCR assays (Sangon Biotech, Shanghai, China).

**Table S9.** DNA sequence in pGEM-T used for transcription of antisense sequence of *lnc-HZ09* or PLD1 mRNA.

**Table S10.** Protein-coding potential of *lnc-HZ09* predicted by CPAT software.

**Table S11.** m6A modification site on *lnc-HZ09* identified by SRAMP software.

**Table S12.** Univariate analysis of the parameters of the RM and HC groups (each n = 15).

**Table S13.** Sequence conservation among various species.

**Figure S1.** Identification of *lnc-HZ09* and overexpression or knockdown of *lnc-HZ09* in human trophoblast cells.

**Figure S2.** Expression levels of nine mRNAs with knockdown of *lnc-HZ09* and the functions of PLD1 in human trophoblast cells.

**Figure S3.** Expression levels of members of the PLD1/RAC1/CDC42 pathway regulated by *lnc-HZ09* in human trophoblast cells.

**Figure S4.** Transcription factors of PLD1 predicted by PROMO software.

**Figure S5.** PLD1 mRNA stability regulated by *lnc-HZ09* in human trophoblast cells.

**Figure S6.** Transcription factors of *lnc-HZ09* predicted by PROMO software.

**Figure S7.** METTL3-mediated m6A RNA methylation on *lnc-HZ09* regulated PLD1 expression level and migration and invasion of human trophoblast cells.

**Figure S8.** Expression levels of members of PLD1/RAC1/CDC42 pathway regulated by BPDE or *lnc-HZ09* in BPDE-exposed human trophoblast cells.

**Figure S9.** PLD1 and *lnc-HZ09* RNA stability in BPDE-exposed human trophoblast cells.

**Figure S10.** The BPDE-DNA adduct levels and the correlation among various RNAs and proteins in HC and RM villous tissues.

**Figure S11.** Sequence alignment of various genes in different species and the protein levels of Sp1, Pld1, Rac1, and Cdc42 in BaP-treated mice.

## References

**Additional File-** Excel Document
